# Supplementary material for: Machine learning as a control strategy for smart upper limb orthosis: a scoping review
Source: Research Square preprint supplement (doi:10.21203/rs.3.rs-3888709/v1), 2024-01-29
Supplement: Supplementary file 1 [file 112b55113b6fc9431d83a704.pdf]

**S10. Description of orthoses' usability test of inserted patents.**

| <b>Author (s)</b>                | <b>Benefits expected</b>              | <b>Correlation between patents and articles (Y/N)</b> |
|----------------------------------|---------------------------------------|-------------------------------------------------------|
| <b>Schweighofer et al., 2010</b> | Feedbacks about position in real-time | N                                                     |
| <b>Murguialday et al., 2016</b>  | Comfortable                           | N                                                     |
| <b>Tang et al., 2017</b>         | Simple control and easy usability     | N                                                     |
| <b>Murguialday et al., 2019</b>  | Comfortable                           | N                                                     |
