# Supplementary material for: Machine learning as a control strategy for smart upper limb orthosis: a scoping review
Source: Research Square preprint supplement (doi:10.21203/rs.3.rs-3888709/v1), 2024-01-29
Supplement: Supplementary file 3 [file 6a86c06f5c51431511fa88c4.pdf]

### S8. Features of the orthoses' control system of inserted patents.

| Author (s)                       | Control strategy (imagetic, ex.) | Cue type or go signal | Supporting feedback                                       | Control type and action                                              |
|----------------------------------|----------------------------------|-----------------------|-----------------------------------------------------------|----------------------------------------------------------------------|
| <b>Schweighofer et al., 2010</b> | -                                | Reception sensor      | Sound and light feedbacks                                 | Reaching, grasping, manipulation                                     |
| <b>Murguialday et al., 2016</b>  | -                                | EMG                   | -                                                         | F/ E                                                                 |
| <b>Tang et al., 2017</b>         | Mental imagery                   | EEG                   | Not Applied                                               | F/ E                                                                 |
| <b>Murguialday et al., 2019</b>  | -                                | EMG and FES           | Visual and auditory cues to the patient with instructions | Moving from a first position to a target position, and then grasping |

Abbreviations: E = Extension; EEG = Electroencephalography; EMG = Electromyography; F = Flexion; FES = Functional Electrical Stimulation; PNF: Proprioceptive Neuromuscular Facilitation; - = Not Informed.
