# Supplementary material for: Machine learning as a control strategy for smart upper limb orthosis: a scoping review
Source: Research Square preprint supplement (doi:10.21203/rs.3.rs-3888709/v1), 2024-01-29
Supplement: Supplementary file 4 [file 831e04aeb27853cd8be0ffef.pdf]

### S5. Description of the orthoses' physical characteristics of inserted articles.

| Author (s)                    | User Intent Modality (sensors type)    | Limb assisted             | Total DOF                        | N° Ind. Actuators | Actuators types | Actuators input force                                                                                                            | Actuators ext. torque/grip force                                               | Power transmission |
|-------------------------------|----------------------------------------|---------------------------|----------------------------------|-------------------|-----------------|----------------------------------------------------------------------------------------------------------------------------------|--------------------------------------------------------------------------------|--------------------|
| <b>Delijorge et al., 2020</b> | EEG sensor                             | Hand fingers              | 2                                | 5                 | DC linear motor | -                                                                                                                                | -                                                                              | Exoskeleton        |
| <b>Ren et al., 2019</b>       | sEMG and IMU                           | Shoulder and elbow        | 8                                | 3                 | Servo motor     | -                                                                                                                                | - Shoulder F: 4.785 Nm/<br>1.937 Nm .<br>- Shoulder E: 6.852 Nm/<br>2.373 Nm . | Exoskeleton        |
| <b>Ha, Kim and Jo, 2018</b>   | Leap motion sensor and pressure sensor | 5 hand fingers            | 2                                | 5                 | Pneumatic       | The PWM generated for driving the PNBA actuator was used to operate from 0 kPa to 89.63 kPa. considering actuator bending motion | -                                                                              | Soft robotic       |
| <b>Wang et al., 2018</b>      | sEMG                                   | Shoulder, elbow and wrist | 3, being 1 passive and 2 actives | 3                 | DC motors       | -                                                                                                                                | - I = 0:079kgm <sup>2</sup> .<br>- Kv = 1.213N.s/rad.                          | End-effector       |

|                                               |                                                       |                           |                                                                                                    |   |  |                                    |      |                                                                          |              |
|-----------------------------------------------|-------------------------------------------------------|---------------------------|----------------------------------------------------------------------------------------------------|---|--|------------------------------------|------|--------------------------------------------------------------------------|--------------|
| <b>Zeng et al., 2018</b>                      | sEMG sensor                                           | Hand fingers              | It has one DOF for F and E. As for the mechanism of the thumb, it has two DOFs for thumb rotation. | 6 |  | Microlinear                        | 30 N | -                                                                        | Cable-driven |
| <b>Khan A, Khan F, Han, 2016</b>              | Load cells                                            | Forearm and shoulder      | 3, being 2 active and 1 passive                                                                    | 2 |  | DC motor                           | -    | - Shoulder: 45 Nm;<br>- Elbow: 25 Nm                                     | -            |
| <b>Agarwal, Fernandez and Deshpande, 2015</b> | Magneto-resistive angle sensor                        | 5 hand fingers            | 2                                                                                                  | 5 |  | Bowden-cable -based series elastic | -    | - MCP: from 0.1N to -0.1N, approximately.<br>- PIP: from 0.05N to -0.05N | Exoskeleton  |
| <b>ng et al., 2015</b>                        | Sensors not specified to measuring the level of force | 5 hand fingers            | 2                                                                                                  | 5 |  | -                                  | -    | -20 to 20N                                                               | Exoskeleton  |
| <b>Khan et al., 2015</b>                      | MCS and load cells                                    | Shoulder and elbow        | 7, being 2 actives and 5 passives                                                                  | - |  | -                                  | -    | - Shoulder: 45 Nm .<br>- Elbow: 25 Nm                                    | Exoskeleton  |
| <b>Ramirez, Alfaro and Chairez, 2015</b>      | sEMG                                                  | 5 hand fingers            | 2                                                                                                  | 6 |  | DC motors                          | -    | -                                                                        | Cable-driven |
| <b>Kavya et al., 2015</b>                     | sEMG sensor                                           | Hand and forearm          | 4                                                                                                  | - |  | Servo motor                        | -    | -                                                                        | -            |
| <b>Chen and Lau, 2015</b>                     | Not specified, but kinematic analysis was done        | Shoulder, elbow and wrist | 5                                                                                                  | 5 |  | DC servo motor                     | -    | -                                                                        | Rigid link   |

|                                 |                               |                           |                                 |   |             |         |    |                                                 |
|---------------------------------|-------------------------------|---------------------------|---------------------------------|---|-------------|---------|----|-------------------------------------------------|
| <b>Loconsole et al., 2014</b>   | sEMG and 3-axis force sensors | Shoulder, elbow and wrist | 5                               | 4 | -           | -       | -  | Exoskeleton                                     |
| <b>Tang et al., 2014</b>        | sEMG                          | Elbow                     | 2                               | 2 | Pneumatic   | 0.6 MPa | -  | Carbon fiber bracer, metal link and nylon joint |
| <b>Seki et al., 2011</b>        | sEMG                          | Elbow                     | 2                               | 1 | DC motor    | -       | -  | Exoskeleton                                     |
| <b>Zhang and Nakamura, 2006</b> | EOG                           | Shoulder and elbow        | 5, being 3 active and 2 passive | 2 | Servo motor | 0.5N    | 8N | End-effector                                    |

Abbreviations: DOF = Degree of Freedom; E = Extension; EEG = electroencephalography; EOG = Electrooculogram; F = Flexion; IMU = Inertial Measurement Unit; MCS = Muscle Circumference Sensor; MCP = Metacarpophalangeal; MPa= Megapascal; PNBA = Pneumatic Networks Bending Actuator; PWM = Pulse with Modulation; sEMG = Surface Electromyography; - = Not informed.
